# Supplementary material
Source: PubMed Central journal article supplement (PMC6596306)
Supplement: NIHMS1024928-supplement-Supplemental_data.pdf [file NIHMS1024928-supplement-Supplemental_data.pdf]

Figure S1. IL-1R1 is required for IL-1 $\beta$  signaling to IRF3, Related to Figure 1

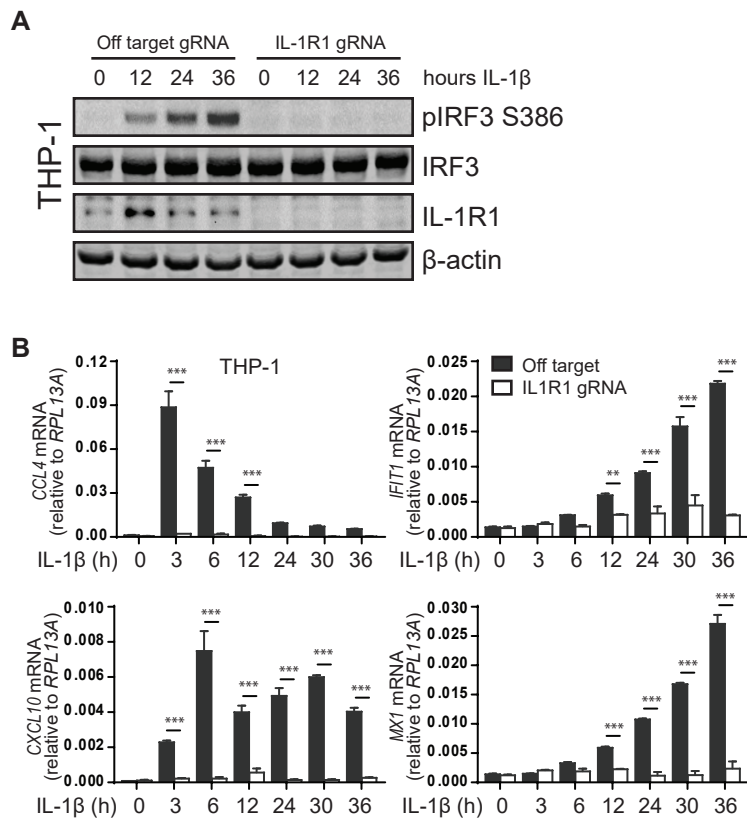

A. THP-1 transduced with lentiCRISPR/Cas9 and off target gRNA or IL-1R1-gRNA were treated with media (0) or 10ng/ml IL-1 $\beta$  for 12-36hrs before protein analysis by immunoblot

B. THP-1 transduced with lentiCRISPR/Cas9 and off target gRNA or IL-1R1-gRNA were treated with media (0) or 10ng/ml IL-1 $\beta$  for 3-36hrs before qRT-PCR analysis. Statistical analysis was performed using student's T test with Holm-Sidak to compare genotypes, n=4 with mean  $\pm$  SEM

\*\*p<0.01, \*\*\*p<0.001

Figure S2. IL-1 $\beta$  initiates antiviral gene programs, Related to Figure 1

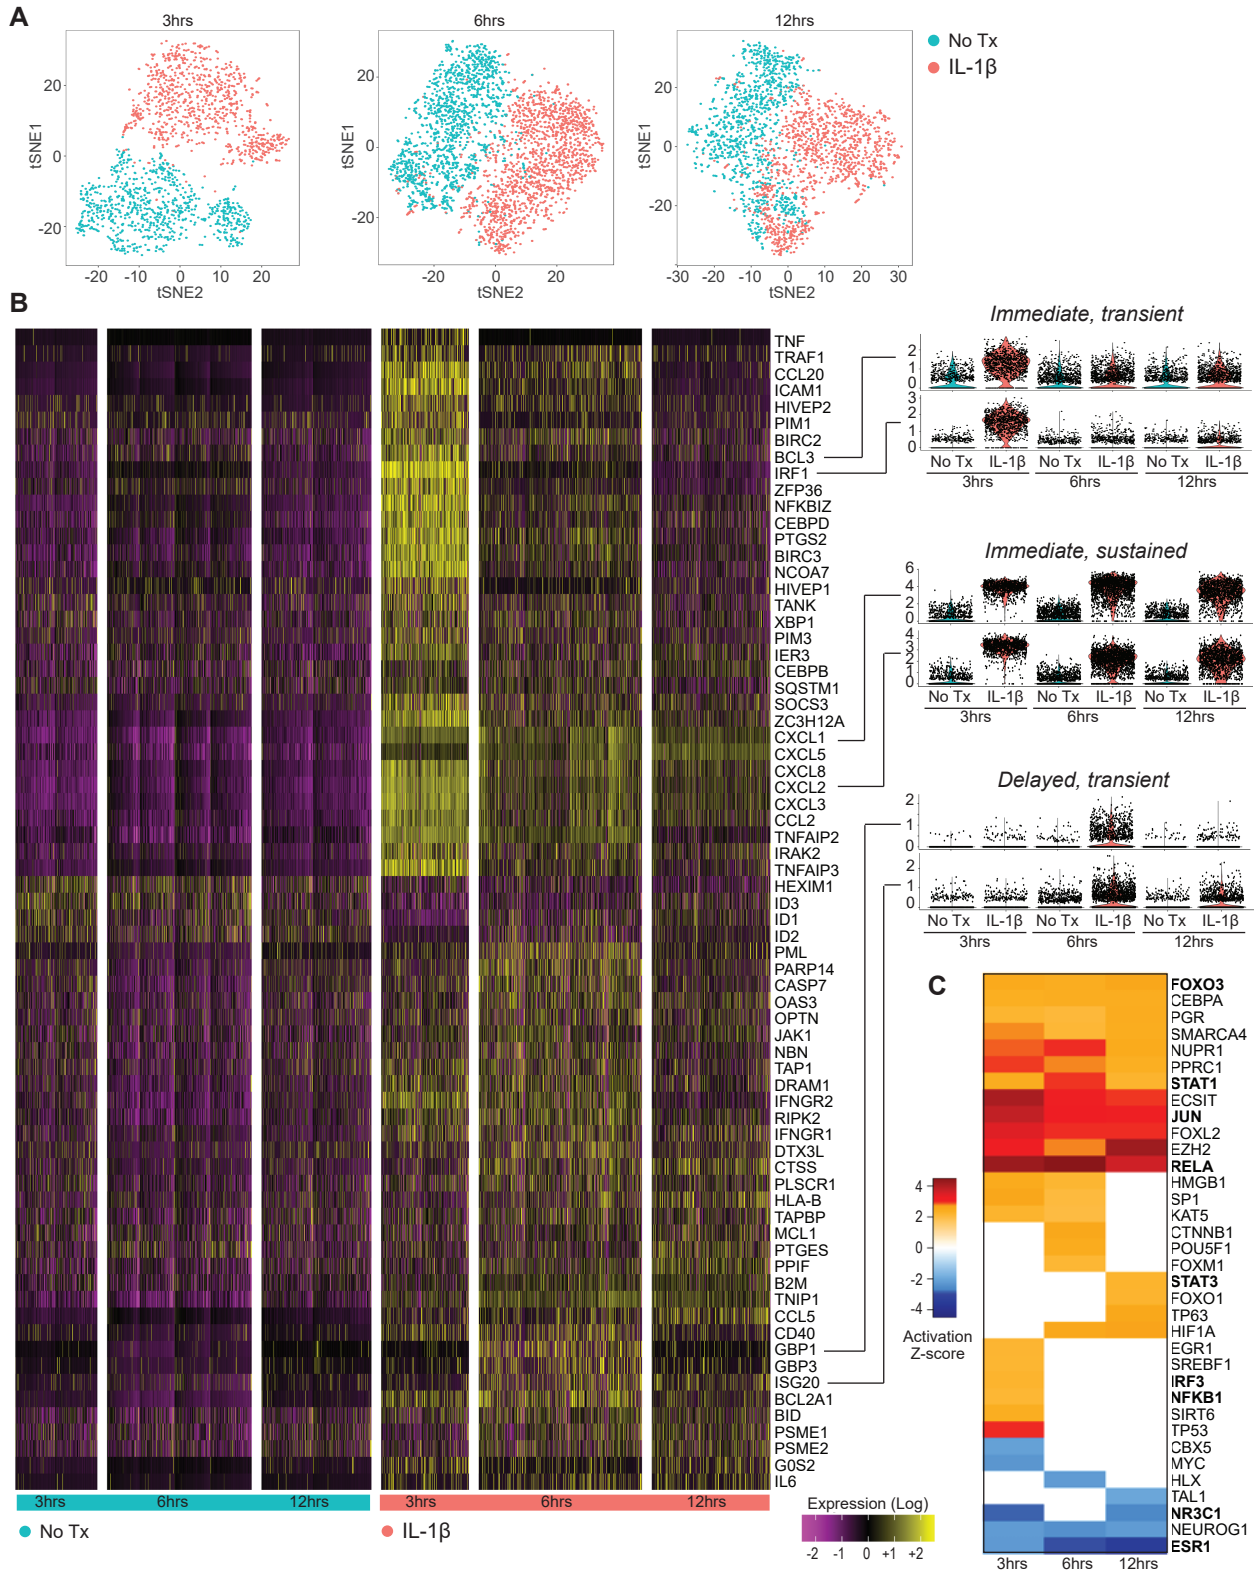

A. A549 were treated with media or 10ng/ml IL-1 $\beta$  for 3, 6 or 12hrs before single cells were isolated and prepared for sequencing. tSNE analysis of scRNA-seq expression with each point representing a single cell treated with media (blue) or IL-1 $\beta$  (orange)

B. Left: Gene expression heatmap of selected differentially expressed genes comparing media and IL-1 $\beta$  treatment. Right: Violin plots representing normalized gene expression of select genes per cell

C. Activation z-score heatmap of predicted transcription factor activity upon treatment with IL-1 $\beta$

Figure S3. Differential IRF requirements for IL-1 $\beta$ -induced antiviral gene induction, Related to Figure 1

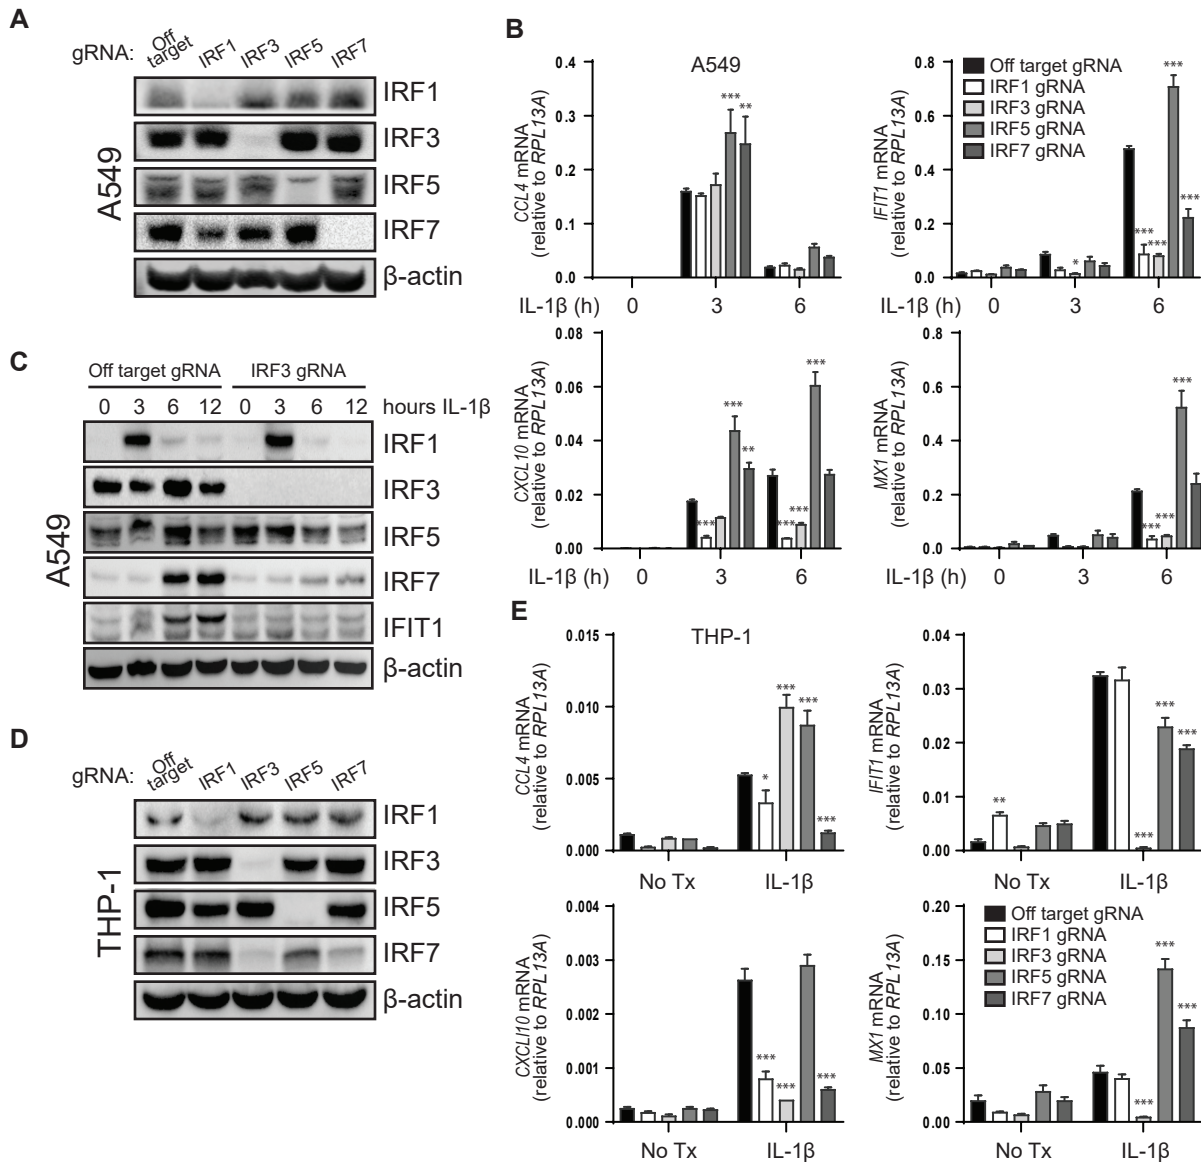

A. A549 were transduced with lentiCRISPR/Cas9 and off target gRNA or IRF1-, IRF3-, IRF5- or IRF7-gRNA before protein analysis by immunoblot

B. A549 transduced with lentiCRISPR/Cas9 and off target gRNA or IRF1-, IRF3-, IRF5- or IRF7-gRNA were treated with media (0) or 10ng/ml IL-1 $\beta$  for 3-6hrs before qRT-PCR analysis. Statistical analysis was performed using two-way ANOVA and Dunnett's to compare knockouts to control cells, n=3 with mean  $\pm$  SEM

C. A549 transduced with lentiCRISPR/Cas9 and off target gRNA or IRF3-gRNA were treated with media (0) or 10ng/ml IL-1 $\beta$  for 3-12hrs before protein analysis by immunoblot

D. THP-1 were transduced with lentiCRISPR/Cas9 and off target gRNA or IRF1-, IRF3-, IRF5- or IRF7-gRNA before protein analysis by immunoblot

E. THP-1 transduced with lentiCRISPR/Cas9 and off target gRNA or IRF1-, IRF3-, IRF5- or IRF7-gRNA were treated with media (0) or 10ng/ml IL-1 $\beta$  for 36hrs before qRT-PCR analysis. Statistical analysis was performed using two-way ANOVA and Dunnett's to compare knockouts to control cells, n=4 with mean  $\pm$  SEM

\*p<0.05, \*\*p<0.01, \*\*\*p<0.001

Figure S4. TBK1/IKK $\epsilon$  mediate IL-1 $\beta$ -induced IRF3 phosphorylation, Related to Figure 2

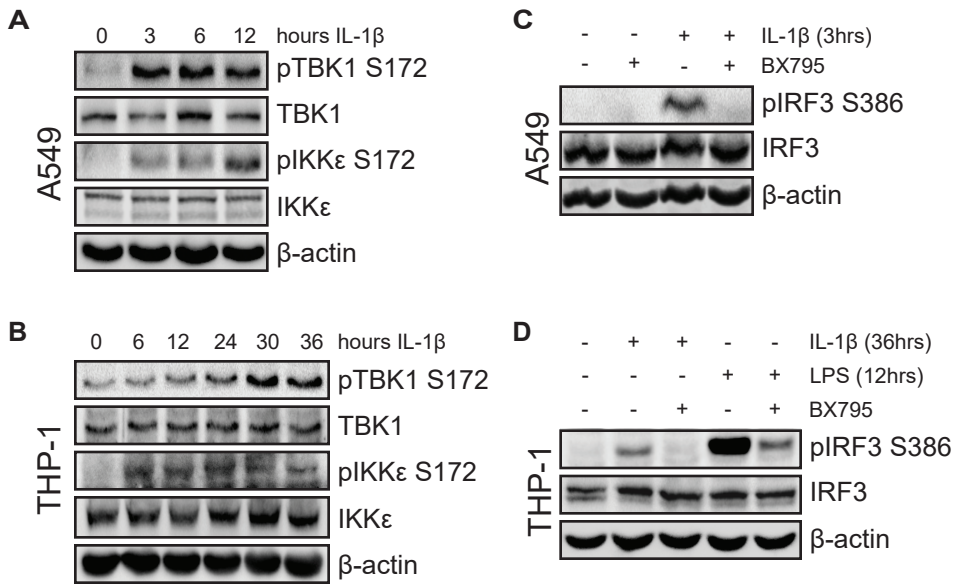

A. A549 were treated with media (0) or 10ng/ml IL-1 $\beta$  for 3-12hrs before protein analysis by immunoblot

B. THP-1 were treated with media (0) or 10ng/ml IL-1 $\beta$  for 6-36hrs before protein analysis by immunoblot

C. A549 were treated with media (0) or 10ng/ml IL-1 $\beta$  for 3 hours +/- 1-hour pre-treatment with DMSO or 1 $\mu$ M BX795 before protein analysis by immunoblot

D. THP-1 were treated with media (0), 10ng/ml IL-1 $\beta$  for 36hrs or 0.5 $\mu$ g/ml LPS for 12hrs +/- 1hr pre-treatment with DMSO or 1 $\mu$ M BX795 before protein analysis by immunoblot

Figure S5. CRISPR-targeting analysis, Related to Figures 2 and 5

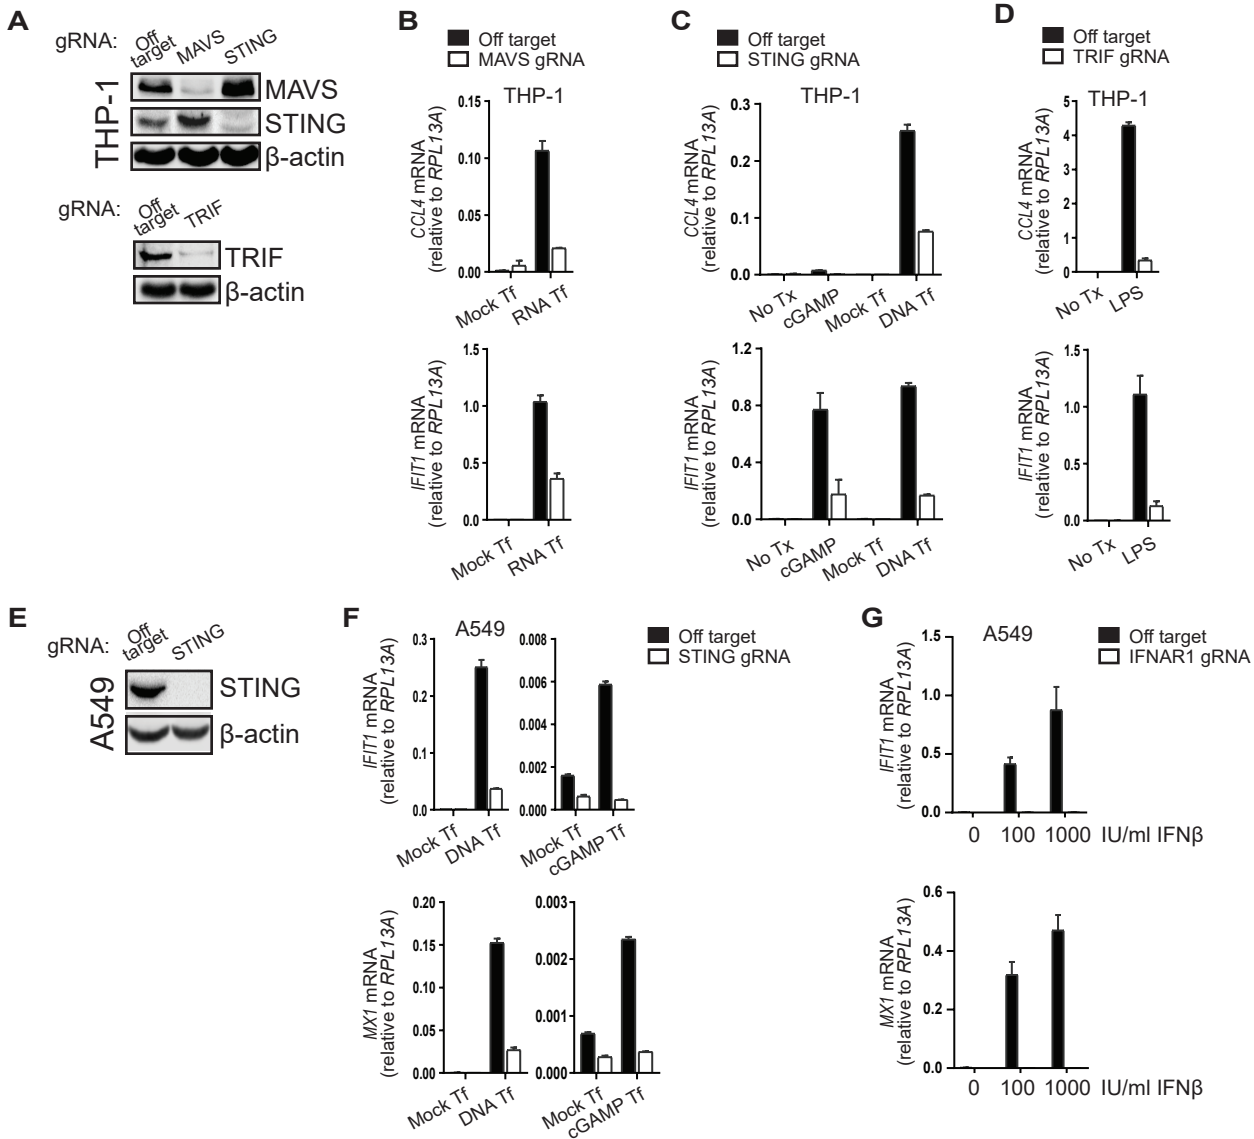

A. THP-1 were transduced with lentiCRISPR/Cas9 and off target gRNA or gRNA targeting MAVS, STING or TRIF before protein analysis by immunoblot

B. THP-1 transduced with lentiCRISPR/Cas9 and off target gRNA or MAVS-gRNA were mock transfected or transfected with 0.1ug/ml PAMP RNA for 6hrs

C. THP-1 transduced with lentiCRISPR/Cas9 and off target gRNA or STING-gRNA were treated with media or 25ug/ml exogenous cGAMP, mock transfected or transfected with 1ug/ml calf thymus DNA for 6hrs

D. THP-1 transduced with lentiCRISPR/Cas9 and off target gRNA or TRIF-gRNA were treated with media or 0.5ug/ml LPS for 6hrs

E. A549 were transduced with lentiCRISPR/Cas9 and off target gRNA or STING-gRNA before protein analysis by immunoblot

F. A549 transduced with lentiCRISPR/Cas9 and off target gRNA or STING-gRNA were mock transfected, transfected with 1ug/ml calf thymus DNA, or transfected with 10ug/ml cGAMP for 6hrs

G. A549 transfected with CRISPR/Cas9 and off target gRNA or IFNAR1-gRNA were treated with media or 100 or 1000IU/ml IFN $\beta$  for 12hrs.

B-D, F-G. After treatment, the indicated transcripts were analyzed by qRT-PCR; n=3 per genotype with mean  $\pm$  SEM.

Tf, Transfection

Figure S6. Exogenous IL-1 $\beta$  does not cause cell death, Related to Figure 3

**A** THP-1

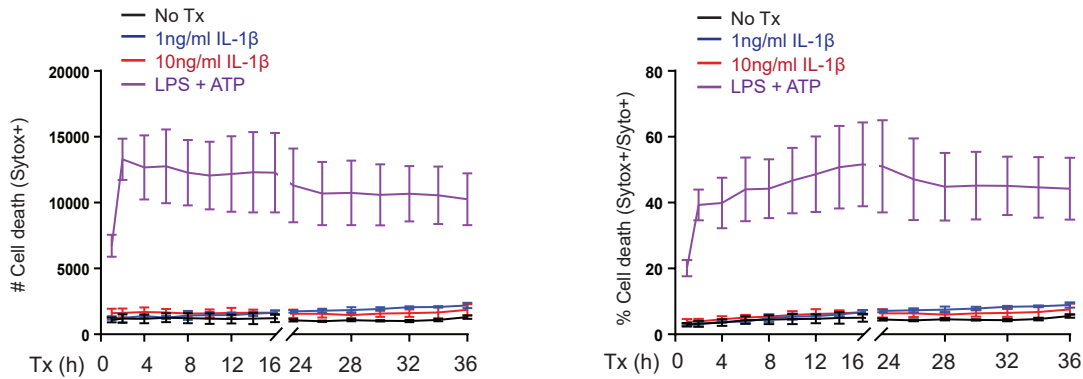

**B** A549

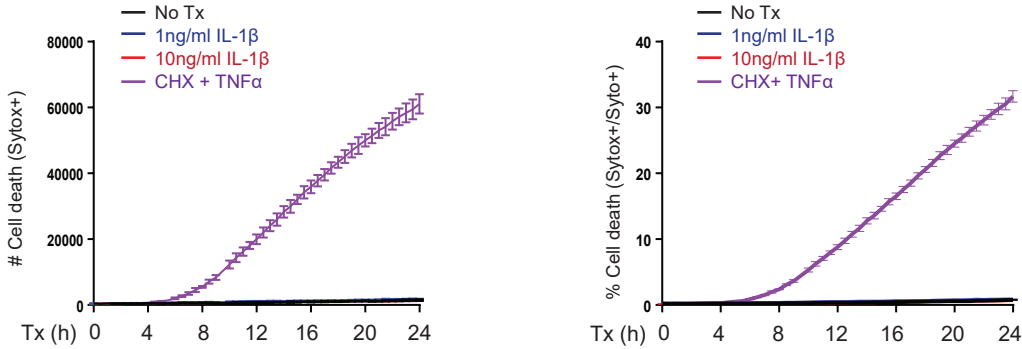

A. THP-1 were treated with media or the indicated concentrations of IL-1 $\beta$  or 0.5 $\mu$ g/ml LPS + 5mM ATP and imaged by IncuCyte live cell imaging to quantify cell death over 36hrs. Left: Cell death number was quantified by counting Sytox-positive cells. Right: Percentage cell death was quantified by dividing Sytox-positive cells by Syto-positive cells. Data represent technical triplicates with mean  $\pm$  SEM

B. A549 were treated with media or the indicated concentrations of IL-1 $\beta$  or 10ng/ml TNF $\alpha$  + 10 $\mu$ M Cycloheximide (CHX) and imaged by IncuCyte live cell imaging to quantify cell death over 24hrs. Left: Cell death number was quantified by counting Sytox-positive cells. Right: Percentage cell death was quantified by dividing Sytox-positive cells by Syto-positive cells. Data represent technical triplicates with mean  $\pm$  SEM

Figure S7. Temporal release of mitochondrial DNA upon IL-1 $\beta$  treatment, Related to Figure 3

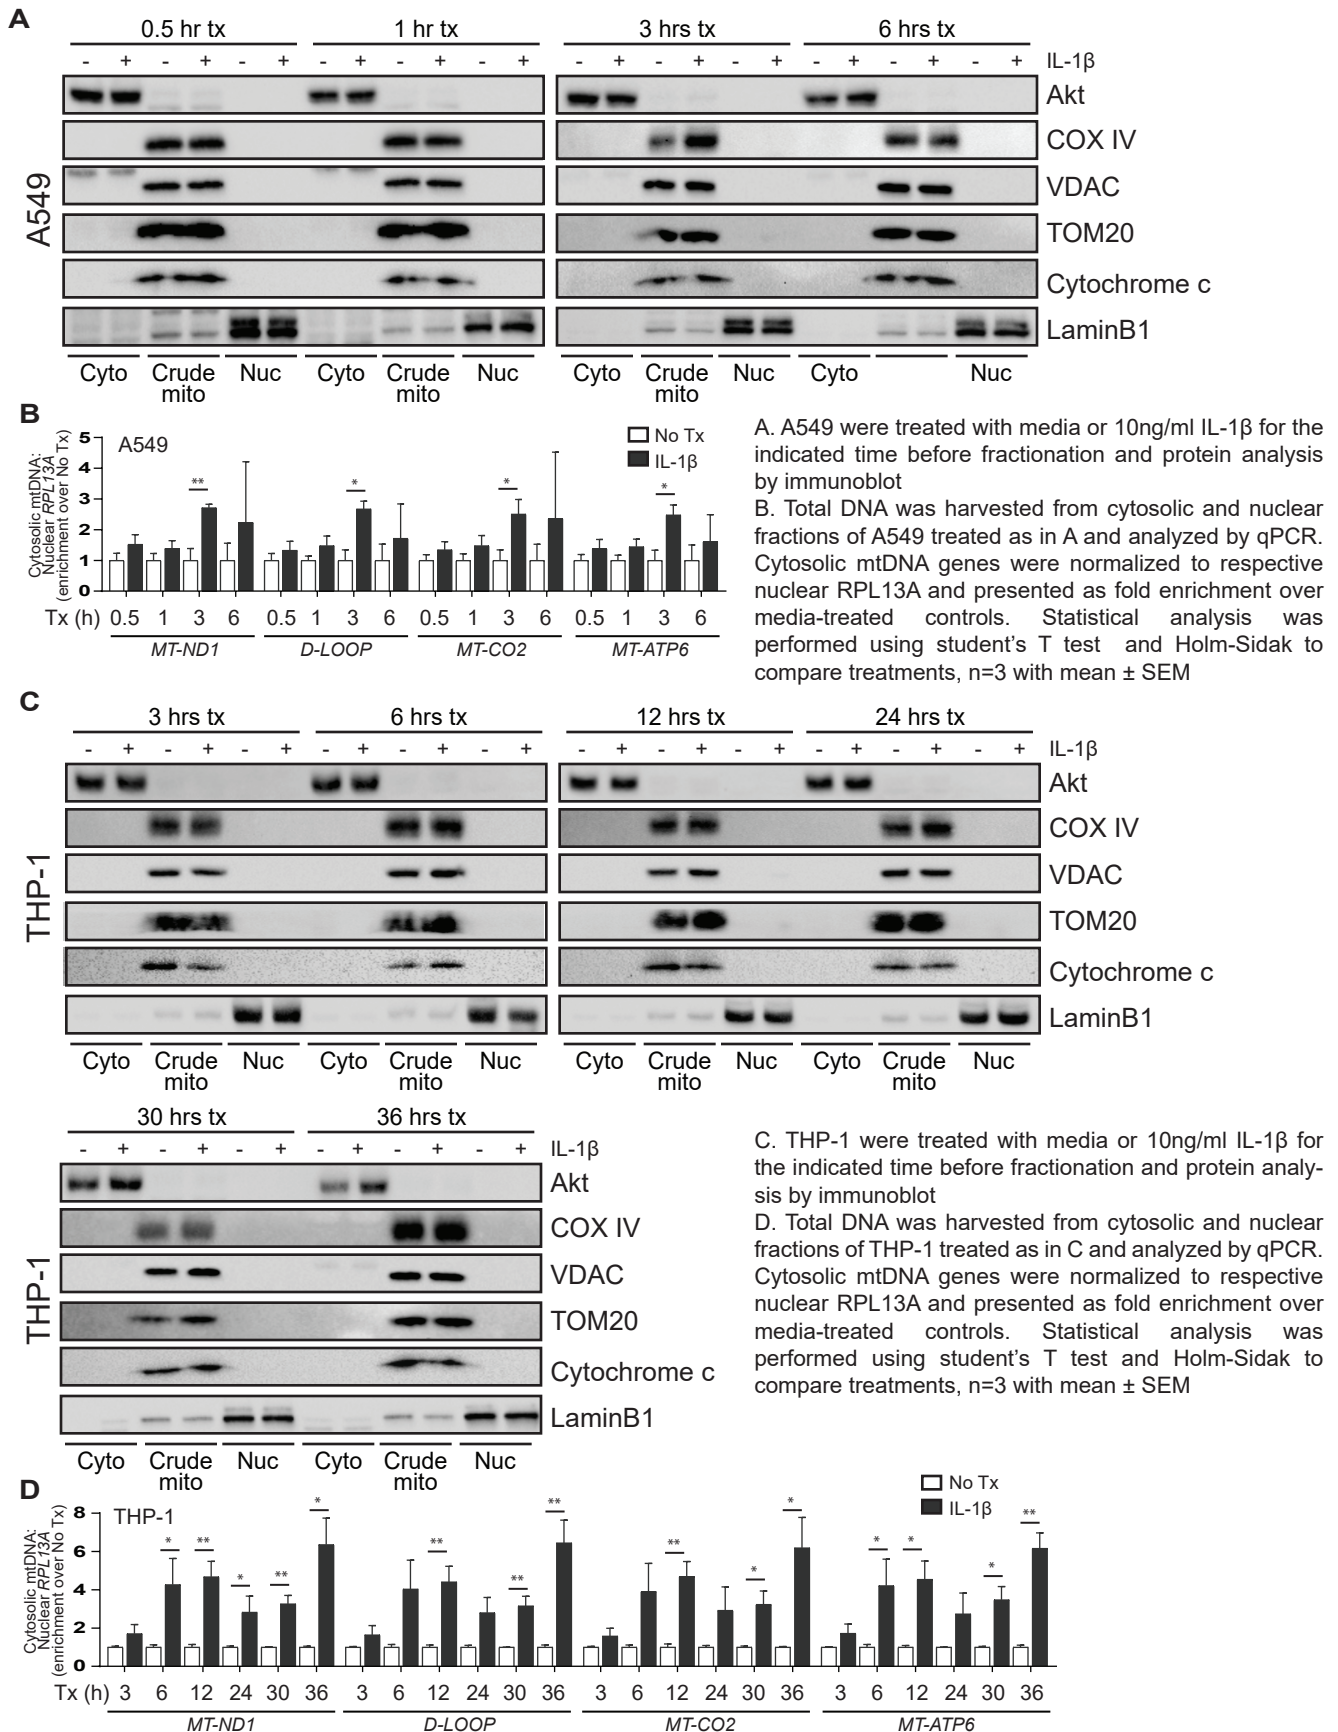

Table S2. Oligonucleotides, Related to Figures 3, 4 and 7

| REAGENT or RESOURCE                                   | SOURCE                          | IDENTIFIER            |
|-------------------------------------------------------|---------------------------------|-----------------------|
| Oligonucleotides                                      |                                 |                       |
| Primer <i>MT-ND1</i> Fwd (CACCCAAGAACAGGGTTTGT)       | <a href="#">(Aguirre, 2017)</a> | N/A                   |
| Primer <i>MT-ND1</i> Rev (TGGCCATGGGTATGTTGTTAA)      | <a href="#">(Aguirre, 2017)</a> | N/A                   |
| Primer <i>D-LOOP</i> Fwd<br>(CTATCACCCCTATTAACCACTCA) | <a href="#">(Aguirre, 2017)</a> | N/A                   |
| Primer <i>D-LOOP</i> Rev<br>(TTCGCCTGTAATATTGAACGTA)  | <a href="#">(Aguirre, 2017)</a> | N/A                   |
| Primer <i>MT-CO2</i> Fwd<br>(AATCGAGTAGTACTCCCGATTG)  | <a href="#">(Aguirre, 2017)</a> | N/A                   |
| Primer <i>MT-CO2</i> Rev<br>(TTCTAGGACGATGGGCATGAAA)  | <a href="#">(Aguirre, 2017)</a> | N/A                   |
| Primer <i>MT-ATP6</i> Fwd<br>(AATCCAAGCCTACGTTTTTCA)  | <a href="#">(Aguirre, 2017)</a> | N/A                   |
| Primer <i>MT-ATP6</i> Rev<br>(AGTATGAGGAGCGTTATGGAGT) | <a href="#">(Aguirre, 2017)</a> | N/A                   |
| DENV-2 Fwd (TGTTGGTGCAACTCTACGTCCACA)                 | This paper                      | GenBank ID GQ398314.1 |
| DENV-2 Rev (TGTGGAACGAGTGCCACtGATCTT)                 | This paper                      | GenBank ID GQ398314.1 |
